# Supplementary material for: Hybrid approach to model the spatial regulation of T cell responses
Source: PubMed Central journal article supplement (PMC5499095; doi:10.1186/s12865-017-0205-0), 2017-06-21
Supplement: 12865_2017_205_MOESM1_ESM.pdf [file 12865_2017_205_MOESM1_ESM.pdf]

## Appendix

### Numerical method

The T cells zone is considered to be a square domain denoted  $\Omega$  where the reaction-diffusion equations describing extracellular cytokines concentrations are solved. We apply Dirichlet conditions to the four borders of the square domain ( $\Gamma$ ). The numerical implementation of the reaction-diffusion equations was done using the finite difference method. Let us consider the boundary value problem ( $P$ ) for the extracellular cytokine field  $I$ . We numerically solve the problem using the alternating direction implicit method. We briefly recall the procedure to be followed below.

$$(P) : \begin{cases} \frac{\partial I}{\partial t} = D\Delta I + W - \sigma I, & \text{in } \Omega \\ I(x, y, 0) = \phi(x, y), & \text{in } \Omega \\ I = I_0 & \text{on } \Gamma, \end{cases}$$

where  $D$  is the diffusion coefficient,  $W$  and  $\sigma$  are the production and degradation factors respectively,  $\phi(x, y)$  represents the initial condition condition for  $I$ ,  $I_0$  is a constant prescribed value at the boundaries. We consider the grid  $(x_i, y_j, t_n) = (ih, jh, n\delta t)$ , where  $h$  and  $\delta t$  are the space and time steps respectively. We denote  $i = 1, 2, \dots, N_x$  and  $j = 1, 2, \dots, N_y$ . To begin with, we rewrite the problem ( $P$ ) in the following form:

$$(P_1) : \begin{cases} \frac{\partial I}{\partial t} = \frac{D}{2}(\frac{\partial^2 I}{\partial x^2} + \frac{\partial^2 I}{\partial y^2}) + \frac{D}{2}(\frac{\partial^2 I}{\partial x^2} + \frac{\partial^2 I}{\partial y^2}) + W - \sigma I, & \text{in } \Omega \\ I(x, y, 0) = \phi(x, y), & \text{in } \Omega \\ I = I_0 & \text{on } \Gamma, \end{cases}$$

We split the first equation of the problem ( $P_1$ ) into two sub-steps as follows:

$$\begin{cases} \frac{I_{i,j}^{n+1/2} - I_{i,j}^n}{\delta t/2} = D \frac{I_{i-1,j}^{n+1/2} - 2I_{i,j}^{n+1/2} + I_{i+1,j}^{n+1/2}}{h^2} + D \frac{I_{i,j-1}^n - 2I_{i,j}^n + I_{i,j+1}^n}{h^2} + W - \sigma I_{i,j}^{n+1/2}, \\ \frac{I_{i,j}^{n+1} - I_{i,j}^{n+1/2}}{\delta t/2} = D \frac{I_{i-1,j}^{n+1} - 2I_{i,j}^{n+1} + I_{i+1,j}^{n+1}}{h^2} + D \frac{I_{i,j-1}^{n+1/2} - 2I_{i,j}^{n+1/2} + I_{i,j+1}^{n+1/2}}{h^2} + W - \sigma I_{i,j}^{n+1}. \end{cases} \quad (1)$$

We solve the first equation for each fixed  $j$  to obtain  $I^{n+1/2}$ . Next, we solve the second to obtain  $I^n$ . Let us consider the first equation:

$$\frac{I_{i,j}^{n+1/2} - I_{i,j}^n}{\delta t/2} = D \frac{I_{i-1,j}^{n+1/2} - 2I_{i,j}^{n+1/2} + I_{i+1,j}^{n+1/2}}{h^2} + D \frac{I_{i,j-1}^n - 2I_{i,j}^n + I_{i,j+1}^n}{h^2} + W - \sigma I_{i,j}^{n+1/2}.$$

Rearranging the terms we obtain:

$$\underbrace{\frac{D}{h^2} I_{i-1,j}^{n+1/2}}_{a_{i,j}} + \underbrace{\left( -\frac{2D}{h^2} - \frac{1}{\delta t/2} - \sigma \right) I_{i,j}^{n+1/2}}_{b_{i,j}} + \underbrace{\frac{D}{h^2} I_{i+1,j}^{n+1/2}}_{c_{i,j}} = \underbrace{-\frac{I_{i,j}^n}{\delta t/2} - D \frac{I_{i,j-1}^n - 2I_{i,j}^n + I_{i,j+1}^n}{h^2} - W}_{f_{i,j}}.$$

Therefore, we can write the first equation of the system 1 in the form:

$$a_{i,j}I_{i-1,j}^{n+1/2} + b_{i,j}I_{i,j}^{n+1/2} + c_{i,j}I_{i+1,j}^{n+1/2} = f_{i,j},$$

for each fixed  $j, j = 1, 2, \dots, N_y - 1$ , we solve numerically:

$$a_i I_{i-1}^{n+1/2} + b_i I_i^{n+1/2} + c_i I_{i+1}^{n+1/2} = f_i, \quad \forall i = 1, 2, \dots, N_x - 1 \quad (2)$$

with the boundary conditions  $I_{i=0}^n = I_{0,1}$ ,  $I_{i=N_x}^n = I_{0,2}$ . We solve the equation (2) using Thomas algorithm. For that, we write the left boundary condition  $I_{i=0} = I_{0,1}$  as follows:

$$I_0^{n+1/2} = L_{1/2}I_1 + K_{1/2},$$

where  $L_{1/2} = 0$  and  $K_{1/2} = I_{0,1}$ . Then from the equation (2) for  $i = 1$ :

$$a_1 I_0^{n+1/2} + b_1 I_1^{n+1/2} + c_1 I_2^{n+1/2} = f_1,$$

we obtain  $I_1^{n+1/2}$ :

$$I_1^{n+1/2} = L_{3/2}I_{1,j} + K_{3/2},$$

where we denote  $L_{3/2} = \frac{-c_1}{b_1}$ ,  $K_{3/2} = \frac{a_1 I_{0,1} - f_1}{-b_1}$ . We continue this process for  $i = 2, 3, \dots, N_x - 1$ :

$$I_i = L_{i+1/2}I_{i+1} + K_{i+1/2}, \quad (3)$$

where  $L_{i+1/2} = \frac{-c_i}{b_i + a_i L_{i-1/2}}$ ,  $K_{i+1/2} = \frac{f_i + a_i K_{i-1/2}}{b_i + a_i L_{i-1/2}}$ . We first obtain the coefficients  $L_{i+1/2}$ ,  $K_{i+1/2}$  using the formula (2). Next, we find the solution  $I^{n+1/2}$  for the sub-step  $n+1/2$  by backward sweep using the equation (3). We apply the same procedure on the second equation of the system (1) to compute the next step solution  $I^n$ .

### Numerical implementation

The source code was written in the Object Oriented Programming (POO) form under C++. The considered time and space units in the model are the minute and the domain length (L) respectively. The library wxWidgets was used to implement a user-friendly interface and visualize the simulations in real-time. The CPU time of numerical simulations was 3 – 4 hours on a computer with four cores and 6GB of RAM.

### Values of parameters

The number of T cells in the computational domain is  $\sim 3 \times 10^3$  with the proportions of CD4<sup>+</sup> and CD8<sup>+</sup> T cells being 2 : 1, and the number of APCs ranging from 30 to 300 cells.

For APC, T-cells and infected cells models, the parameters were fitted with experimental data:

1.  $k_1$  The rate of T-cells production and release into the body: 1.8 /hr;
2.  $k_2$  The death rate of T-cells in the body: 0.12 /hr.

3.  $k_3$  The elimination rate of the infected cells by T-cells  $1.8 \times 10^{-6} /hr$ ;
4.  $a$  A growth rate parameter of infected cells :  $0.00024 /hr$ .
5.  $h$  A parameter in the growth function of infected cells:  $0.006 /hr$ .

For the IL-2 controlled processes the following parameter values were used taken from [43]:

1.  $n_T$  - the number of IL-2 molecules internalized by T cells via IL-2 receptors: 2000-5000 per T cell;
2.  $I_i^*$  - the saturation concentration of IL-2 for T cell division in vitro:  $6 \times 10^{10}$  molec/ml for  $5 \times 10^4$  cells/ml;
3.  $\rho_{IL2}$  - the secretion rate of IL-2 by single  $CD4^+$  T cell:  $7 \times 10^5$  molec/hr;
4.  $b_1$  - the degradation rate of extracellular IL-2:  $0.5 /hr$ ;

For illustrative purpose, we assume that the degradation of the IL-2 effect on the intracellular activation  $d_{inIL2}$  is equal to  $d_{T_{act}}$ .

For the type I IFN controlled processes the following parameter values were used taken from [29]:

1.  $\rho_{IFN}$  - the secretion rate of type I IFN by single activated APC (plasmacytoid dendritic cell):  $1.6 \times 10^4$  molec/hr;
2.  $b_2$  - the degradation rate of extracellular type I IFN:  $0.012 /hr$ ;
3.  $D_{IL}, D_{IFN}$  - the diffusion coefficients of IL-2 and type I IFN. As the molecular weights of IL-2 and type I IFN are close to that of myoglobin, we used the following estimate of the diffusion coefficient  $0.16 \text{ mm}^3/h$ .

The quantitative specification of the effect of signalling on gene activation requires a separate study. To illustrate the model performance, it was enough to assume some reference values as follows:  $\alpha_1 \sim \alpha_2 \sim 1 /(\text{molec hr})$  and  $d_1 \sim d_2 \sim 0.1 /(\text{hr})$ . The proliferation and differentiation thresholds have been arbitrarily set to be  $I_i^* = 100 \text{ Units}(U)$  and  $C_i^* = 2000 U$ .
